# Supplementary material
Source: Royal Society of Chemistry journal article supplement (doi:10.1039/d5se01488c)
Supplement: d5se01488c1.pdf [file d5se01488c1.pdf]

## 1 Electrochemical conversion of CO<sub>2</sub> plasmas

2 Haytham E. M. Hussein,<sup>a,d</sup> Panagiotis N. Kechagiopoulos,<sup>b</sup> Angel Cuesta<sup>a,c</sup>

3 <sup>a</sup>Advanced Centre for Energy and Sustainability (ACES), School of Natural and  
4 Computing Sciences, University of Aberdeen, AB24 3UE Aberdeen, Scotland, UK;

5 <sup>b</sup>Chemical Processes & Materials Group, School of Engineering, University of  
6 Aberdeen, Aberdeen AB24 3UE, UK; <sup>c</sup>Instituto de Química Física Blas Cabrera, CSIC,  
7 C. Serrano 119, E-28006 Madrid, Spain

8 <sup>d</sup>GSK Carbon Neutral Laboratories for Sustainable Chemistry, Jubilee Campus,  
9 Wollaton Road, University of Nottingham, Nottingham, NG8 1BB, UK

10

### Table of contents

| Section | Description                                                                                                                                                                         | Page |
|---------|-------------------------------------------------------------------------------------------------------------------------------------------------------------------------------------|------|
| S1      | Images of the catalysts used during the electrochemical conversion of CO <sub>2</sub> and CO <sub>2</sub> NTP                                                                       | 2    |
| S2      | 3D CAD drawing and images describing the components of the electrolyte-gap electrolyser when integrated with the CO <sub>2</sub> plasma source                                      | 4    |
| S3      | CO <sub>2</sub> plasma power calculation and Optical emission spectroscopy                                                                                                          | 7    |
| S4      | An electrochemical and product comparison between the performance of the electrolyser cell when the plasma source is on and off at different current densities for a fixed duration | 14   |
| S5      | Faradaic and energy efficiency for gas and liquid products from CO <sub>2</sub> electrochemical conversion                                                                          | 25   |
| S6      | Carbon efficiency for gas products from CO <sub>2</sub> electrochemical conversion                                                                                                  | 29   |
| S7      | Carbon efficiency for liquid products from CO <sub>2</sub> electrochemical conversion                                                                                               | 32   |
| S8      | Carbon efficiency for carbonate and bicarbonate products from CO <sub>2</sub> electrochemical conversion                                                                            | 33   |
| S9      | Carbon efficiency for all products from CO <sub>2</sub> electrochemical conversion                                                                                                  | 35   |

11



1 **S1: Images of the catalysts used during the electrochemical conversion of CO<sub>2</sub>**  
2 **and CO<sub>2</sub> NTP**

3

4 The SEM images in Fig. S1(ai and aii) reveal the structure of the cathode, depicting  
5 CuO nanoparticles dispersed on the GDE surface and the anode composed of IrO<sub>2</sub>  
6 (Fig. S1(b)). Fig. S1 (c) and (d) show the energy-dispersive X-ray spectroscopy  
7 (XEDS) data of the corresponding catalyst.

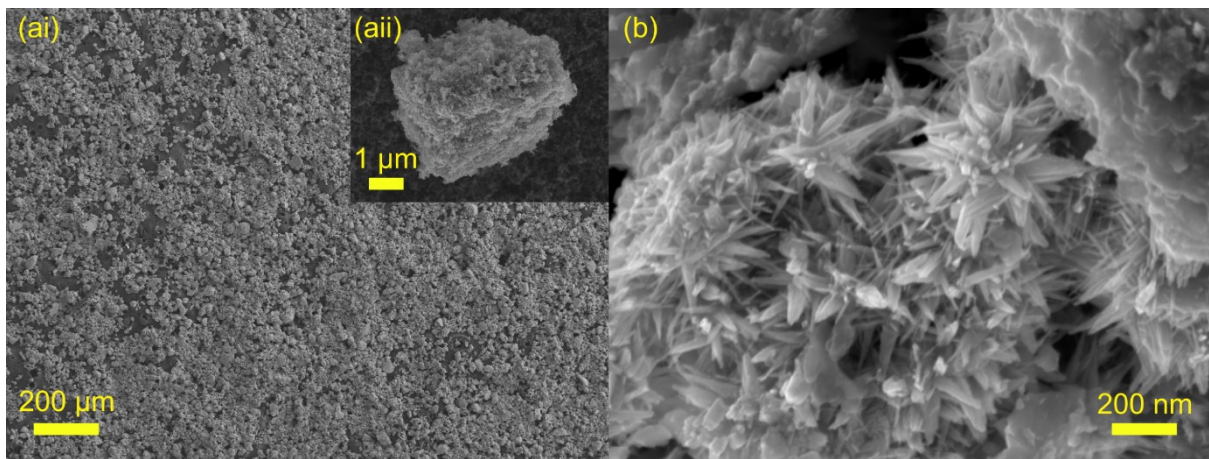

8

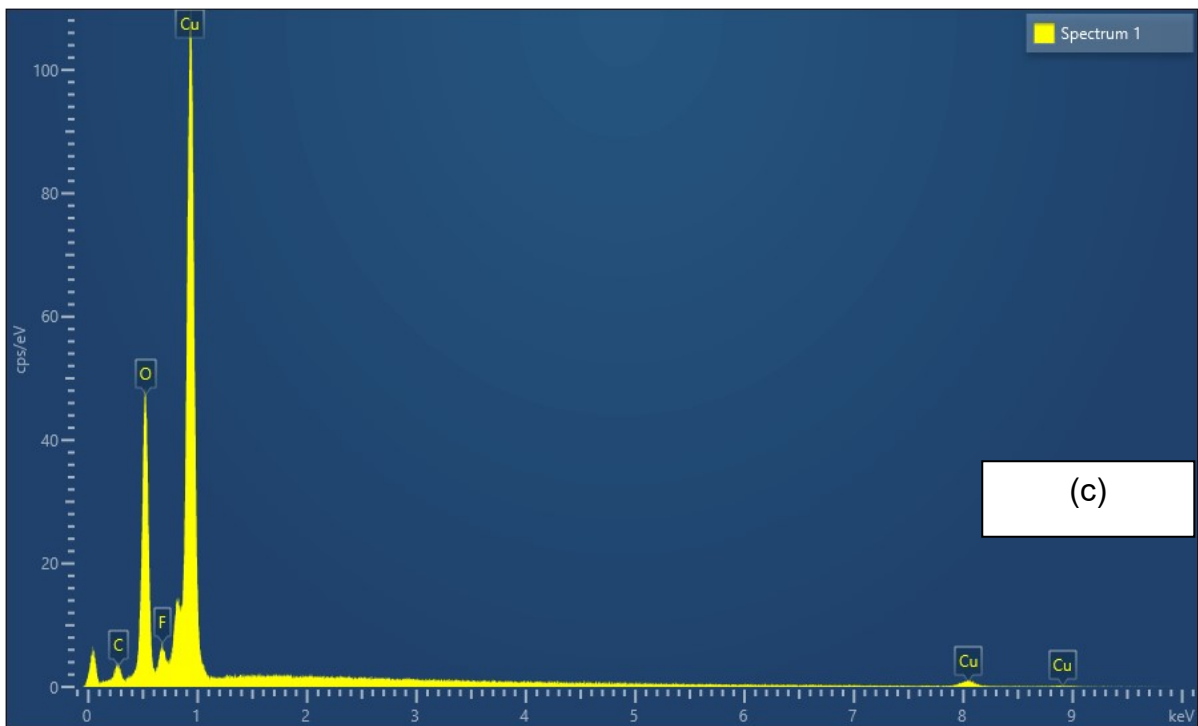

9  
10

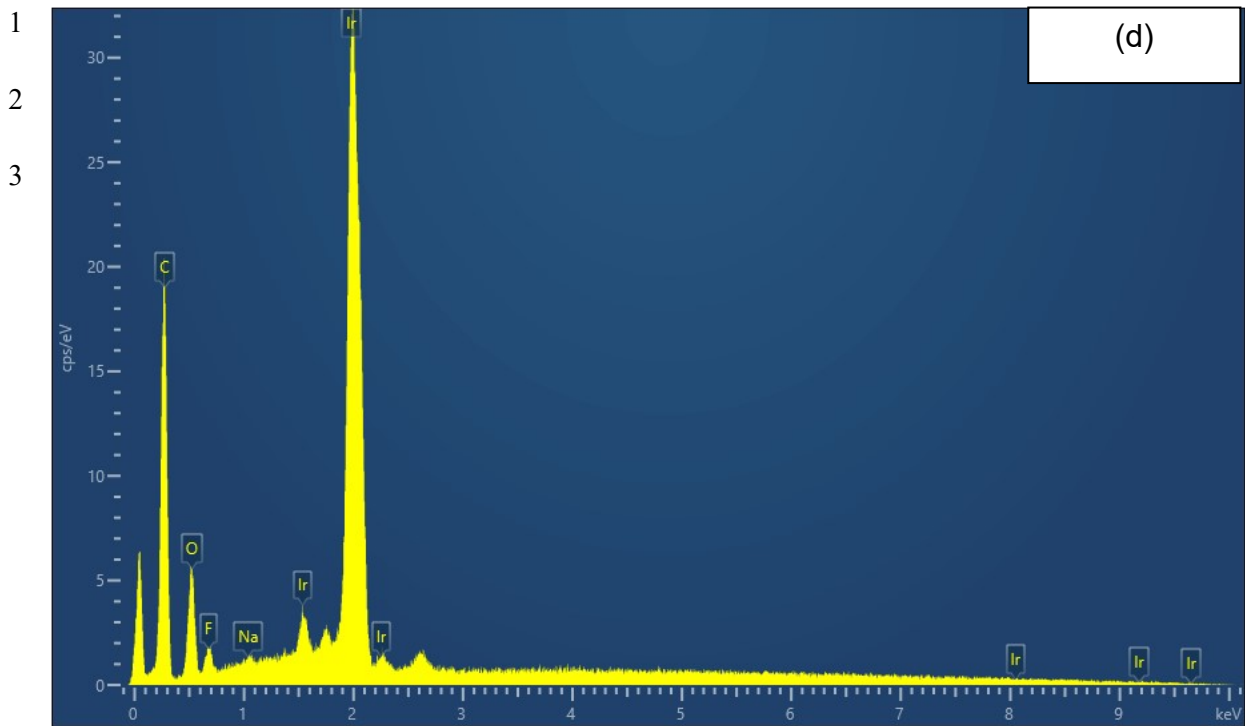

**Figure S1:** SEM images of the cathode (ai), the inset is a zoom into one of the CuO nanoparticles(aii) and the anode is made of IrO<sub>2</sub> nanoparticles (b). XEDS spectrum of CuO (c) and IrO<sub>2</sub> (d).

1 **S2: 3D CAD drawing and images describing the components of the electrolyte-**  
2 **gap electrolyser when integrated with the CO<sub>2</sub> plasma source**

3 The 3D CAD schematic (Fig. S2(a)) and a photograph of the experimental setup (Fig.  
4 S2(b)) describe an electrolyte-gap electrolyser optimised for CO<sub>2</sub> plasma integration.  
5 The plasma source introduces reactive species (*e.g.*, CO molecules or excited states,  
6 O radicals) or energetic electrons that lower the activation barrier for CO<sub>2</sub> reduction.  
7 This design aimed to combine efficient mass transport with plasma activation, which  
8 may explain the improved performance metrics in Figs. S9–S13. A rod tip-to-cathode  
9 distance of 10 mm was selected to ensure stable discharge operation without arcing  
10 and to facilitate reproducible integration with the cell. Future research will focus on the  
11 systematic optimisation of this distance, as it significantly influences post-discharge  
12 transport and the decay of excited species. Note that methanesulfonate (SO<sub>3</sub>CH<sub>3</sub>),  
13 also referred to as mesylate, is frequently employed in electrochemical CO<sub>2</sub> reduction  
14 (CO<sub>2</sub>RR) as a "spectator" ion, indicating that it neither participates in reactions nor  
15 influences the catalyst.<sup>1</sup> Its chemical structure and electronic properties confer  
16 stability, with the sulfur atom in methanesulfonate existing in its highest oxidation state  
17 (+6). The reduction of this sulfur would necessitate the cleavage of strong bonds,  
18 requiring more energy than the reduction of CO<sub>2</sub> or water. Methanesulfonate exhibits  
19 stability across a broad range of potentials, exceeding those typically utilised for CO<sub>2</sub>  
20 reduction (approximately -1.5 V vs. RHE).<sup>1</sup> Unlike other sulfur-containing compounds,  
21 methanesulfonate possesses a robust carbon-sulfur bond that resists cleavage,  
22 thereby preventing the formation and adsorption of deleterious substances such as  
23 hydrogen sulfide on the catalyst.<sup>2</sup> Unlike bicarbonate, methanesulfonate does not  
24 react with CO<sub>2</sub> or its intermediates, serving solely to facilitate ionic conductivity.<sup>2</sup>

25

26

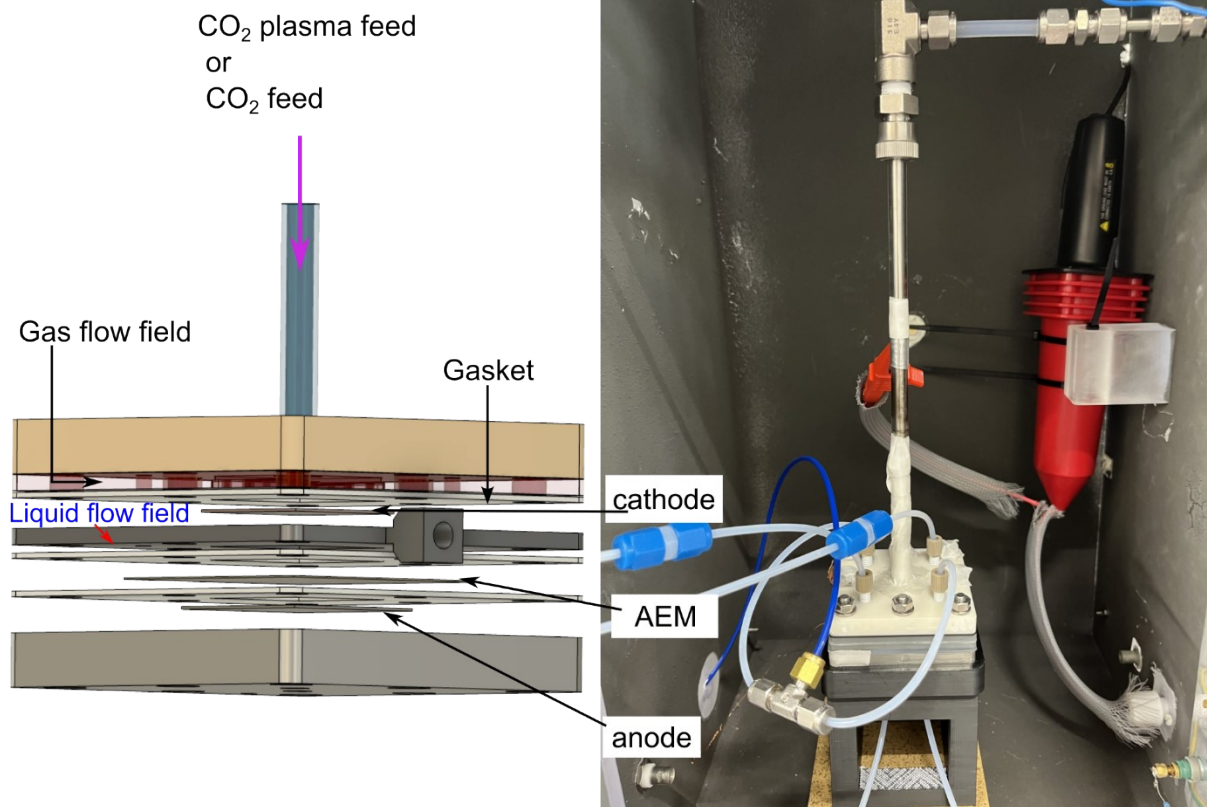

(a) A schematic presentation of the cell

(b) A photograph of the experimental set-up

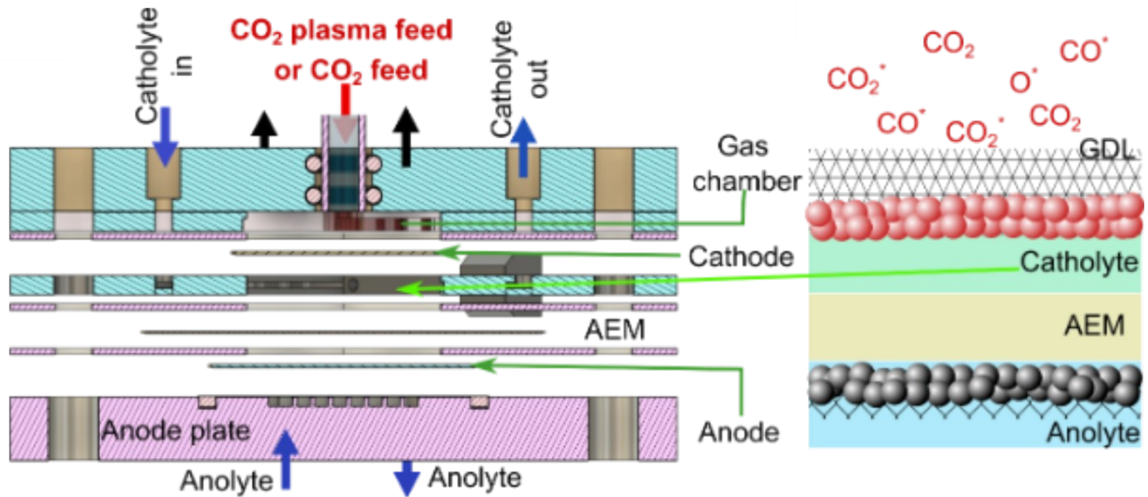

1 (c) A cross section and a schematic representation of the electrolyte-gap electrolyser

2 **Figure S2:** (a) Schematic representation and (b) a photograph of the electrolyte-gap  
 3 electrolyser, with a catholyte flow field between the cathode and the AEM. There is no  
 4 electrolyte gap between the AEM and the anode. The anolyte flows through a titanium  
 5 flow plate at the back of the anode. (c) Cross-section and schematic representation of  
 6 the electrolyte-gap electrolyser.

7

1 **S3: CO<sub>2</sub> plasma power calculation and Optical emission spectroscopy**

2 We calculated the plasma power by analysing the voltage and charge cycles from the  
3 experimental data using Lissajous figure analysis, as shown in Fig. S3, based on the  
4 voltage and charge signals, as shown in Fig. S4. The current was obtained in certain  
5 cases through a passive probe sampling the voltage across a resistor (68 Ω) placed

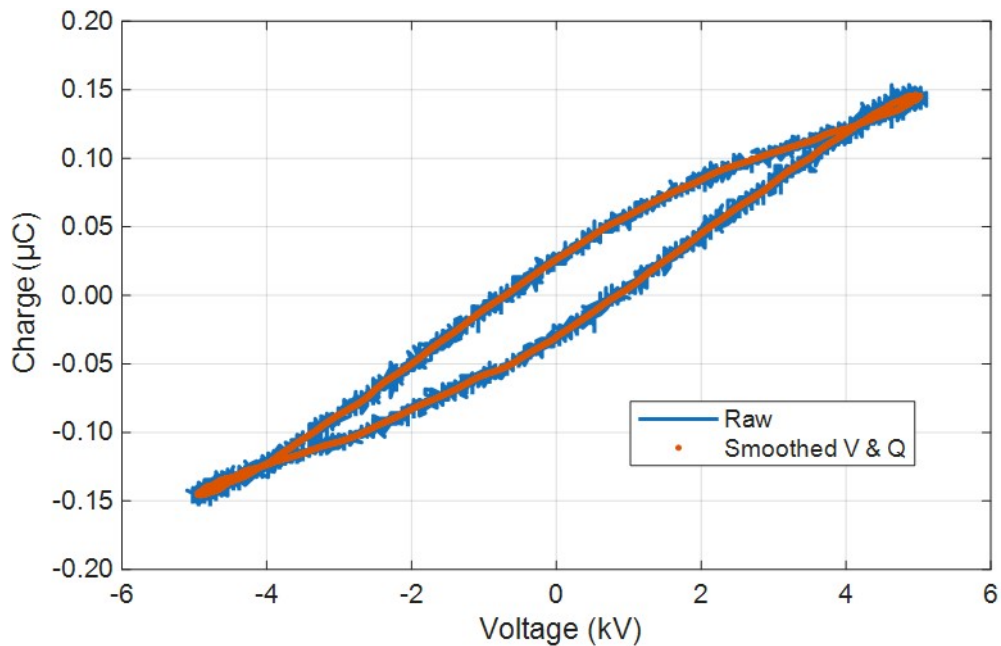

6 on the ground line.

7 **Figure S3:** The Lissajous plot of the CO<sub>2</sub> DBD plasma

8

9 **Figure S4:** Current, charge, and voltage traces vs time

10 Optical emission spectroscopy (OES) analyses the populations of various species  
11 generated in CO<sub>2</sub> NTP DBD, including CO<sub>2</sub> vibrational states, O radicals, and CO

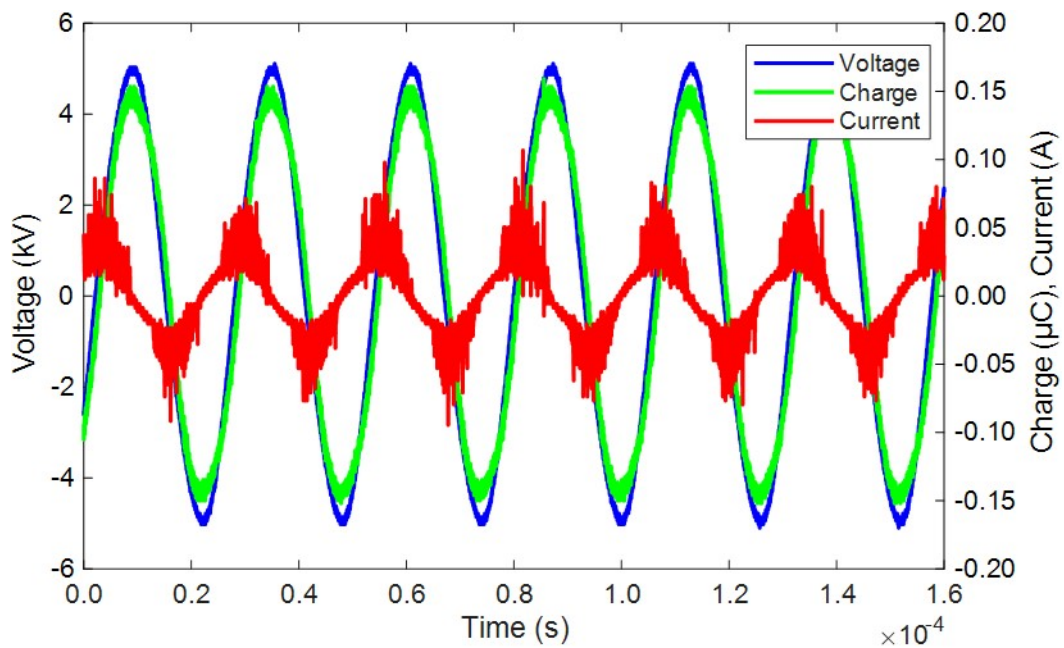

1 molecules, during non-thermal CO<sub>2</sub> plasma discharge (see Fig. S5 and Table S11).  
2 The observed OES features align with previous studies on CO<sub>2</sub> dielectric barrier  
3 discharges, which typically display CO molecular bands, including the Ångström  
4 system, and CO<sub>2</sub><sup>+</sup> ultraviolet features, along with atomic oxygen lines depending on  
5 the dissociation conditions.<sup>3</sup> For instance, the CO Ångström emission near ~451 nm  
6 is commonly employed for CO<sub>2</sub> NTP DBD diagnostics, and CO<sub>2</sub><sup>+</sup> UV features around  
7 ~288–290 nm are indicative of CO<sub>2</sub><sup>+</sup> emission. The positions of the atomic oxygen  
8 lines were corroborated using the NIST Atomic Spectra Database.<sup>1</sup>

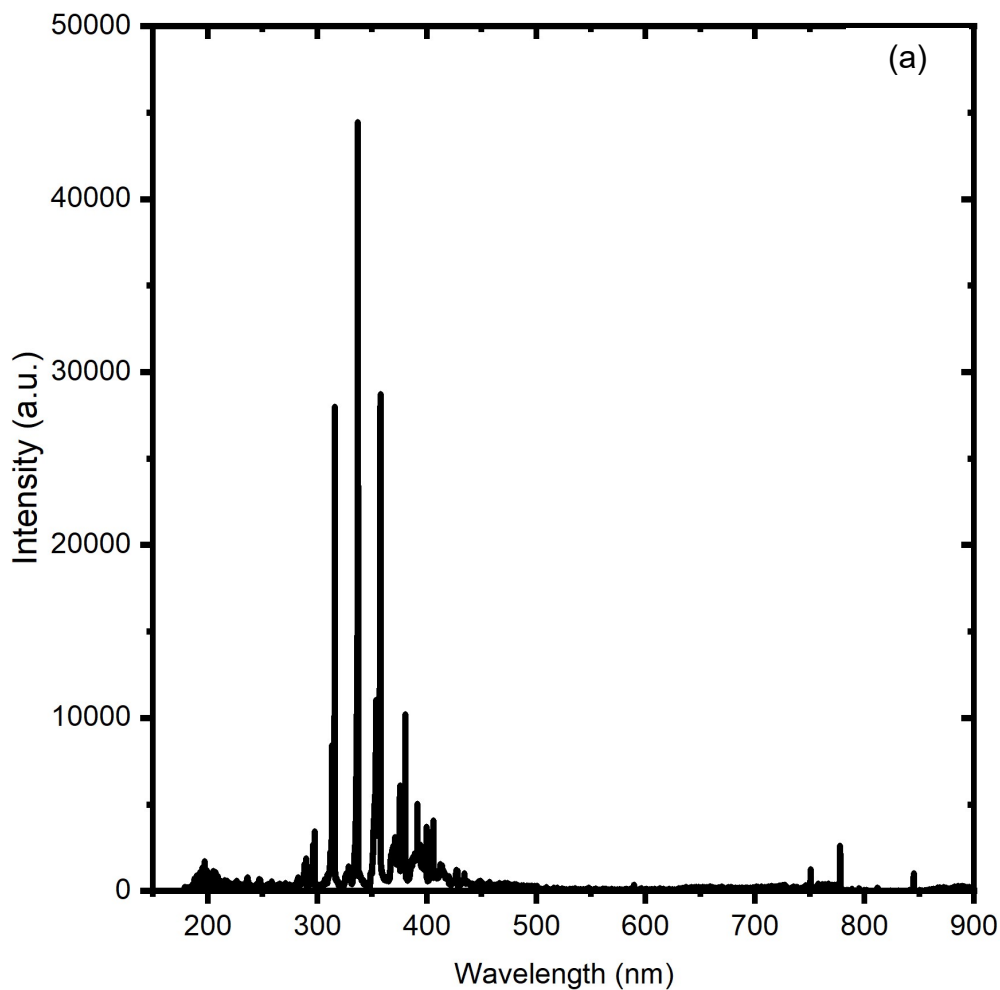

9

10

11

<sup>1</sup> Kramida, A., Ralchenko, Yu., Reader, J., and NIST ASD Team (2026). NIST Atomic Spectra Database (Version 5.14), [Online]. Available: <https://physics.nist.gov/asd> [Accessed: January 16, 2026].

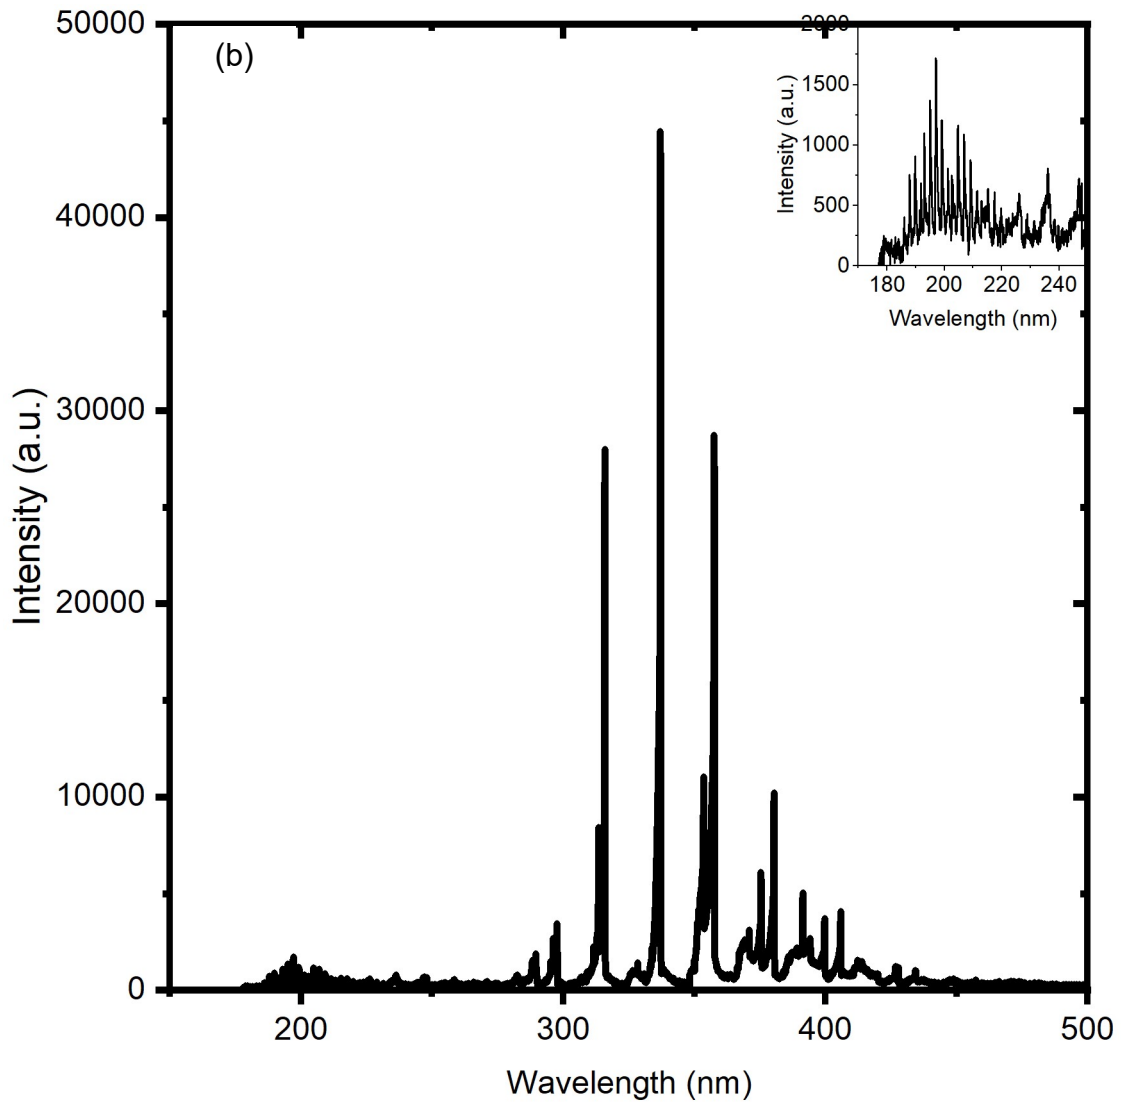

**Figure S5:** Optical emission spectrum of the non-thermal plasma generated by CO<sub>2</sub> dielectric barrier discharge (DBD) setup. (a) extended view and (b) zoom-in plot between 150 nm and 500 nm.

1  
2  
3  
4  
5  
6  
7

1 **Table S1:** Molecular diagnosis of CO<sub>2</sub> NTP DBD. Molecular and atomic emission  
 2 assignments for the CO<sub>2</sub> DBD spectrum. The CO/CO<sub>2</sub><sup>+</sup> band assignments were based  
 3 on the literature concerning CO<sub>2</sub> DBD OES, the and atomic line positions were cross-  
 4 referenced with the NIST Atomic Spectra Database.

| Wavelength (nm) | Intensity | Species                     | Transition                                    | Line (nm) | Relative Intensity |
|-----------------|-----------|-----------------------------|-----------------------------------------------|-----------|--------------------|
| 189.798         | 910.716   | O                           | 3p' 5S°-4s'<br>5P                             | 189.7102  | 355                |
| 189.798         | 910.716   | O                           | 3d 3D-3s'<br>3P°                              | 189.8455  | 1                  |
| 189.798         | 910.716   | O                           | 3p' 1D-4f<br>1F°                              | 189.8603  | 270                |
| 189.798         | 910.716   | O                           | 3d 3D-3s'<br>3P°                              | 189.8816  | 5                  |
| 195.032         | 1370.72   | O                           | 3p 2P°-5d<br>4P                               | 194.9376  | 1                  |
| 195.032         | 1370.72   | O                           | 3p 2P°-5d<br>4P                               | 194.9376  | 1                  |
| 199.117         | 1206.16   | O                           | 3p 4P°-5s<br>2P                               | 199.1658  | 0                  |
| 206.869         | 1089.05   | CO <sup>+</sup>             | X <sup>2</sup> Sig+-<br>B <sup>2</sup> Sig+   | 206.78    | 100                |
| 206.869         | 1089.05   | CO <sup>+</sup>             | X <sup>2</sup> Sig+-<br>B <sup>2</sup> Sig+   | 206.79    | 100                |
| 206.869         | 1089.05   | O <sub>2</sub> <sup>+</sup> | X <sup>2</sup> Pi(g)-<br>A <sup>2</sup> Pi(u) | 206.83    | 0                  |
| 209.054         | 879.272   | CO                          | X <sup>1</sup> Sig+-<br>A <sup>1</sup> Pi     | 208.99    | 1000               |
| 209.054         | 879.272   | CO <sup>+</sup>             | X <sup>2</sup> Sig+-<br>B <sup>2</sup> Sig+   | 209.1     | 400                |
| 211.465         | 619.494   | O                           | 3p 2F°-3d<br>2D                               | 211.528   | 2                  |
| 211.465         | 619.494   | O                           | 4p 2P°-3p<br>2D                               | 211.402   | 0                  |

|         |         |                              |                                           |          |      |
|---------|---------|------------------------------|-------------------------------------------|----------|------|
| 211.465 | 619.494 | O                            | 5d <sup>2</sup> D- 6p<br><sup>2</sup> P°  | 211.4435 | 213  |
| 211.465 | 619.494 | O                            | 5d <sup>2</sup> D- 6p<br><sup>2</sup> P°  | 211.4435 | 43   |
| 211.465 | 619.494 | O                            | 5d <sup>2</sup> D- 6p<br><sup>2</sup> P°  | 211.4837 | 387  |
| 288.408 | 1575.16 | O                            | 3p <sup>3</sup> P-3d<br><sup>3</sup> P°   | 288.3809 | 1    |
| 288.408 | 1575.16 | O                            | 3p <sup>3</sup> P-3d<br><sup>3</sup> P°   | 288.3856 | 2    |
| 288.408 | 1575.16 | O                            | 3d 4F-5f<br>4F°                           | 288.3912 | 9    |
| 288.408 | 1575.16 | O                            | 3d 4F-5fF<br><sup>2</sup> [2]°            | 288.4221 | 0    |
| 288.408 | 1575.16 | O                            | 3d 4F-5fF<br><sup>2</sup> [4]°            | 288.4756 | 0    |
| 288.408 | 1575.16 | CO <sub>2</sub> <sup>+</sup> | X <sup>2</sup> Pi-<br>A <sup>2</sup> Sig+ | 288.4    | 0    |
| 311.57  | 2256.05 | O                            | 3p <sup>3</sup> S-3d<br><sup>3</sup> P°   | 311.5674 | 68   |
| 313.488 | 8420.49 | O                            | 3p 4D°-4s<br>4P                           | 313.4213 | 113  |
| 313.488 | 8420.49 | O                            | 3p 4D°-4s<br>4P                           | 313.4328 | 225  |
| 313.488 | 8420.49 | O                            | 3p 4D°-4s<br>4P                           | 313.4726 | 136  |
| 313.488 | 8420.49 | O                            | 3p 4D°-4s<br>4P                           | 313.4828 | 1077 |
| 313.488 | 8420.49 | O                            | 3p <sup>2</sup> P-3d<br><sup>2</sup> P°   | 313.507  | 40   |
| 313.488 | 8420.49 | CO                           | a <sup>3</sup> Pi-<br>b <sup>3</sup> Sig+ | 313.44   | 800  |
| 313.488 | 8420.49 | CO <sub>2</sub> <sup>+</sup> | X <sup>2</sup> Pi-A <sup>2</sup> Pi       | 313.46   | 400  |

|         |         |                              |                                               |          |      |
|---------|---------|------------------------------|-----------------------------------------------|----------|------|
| 337.004 | 44460.9 | O                            | 3d 4F-5p<br>4D°                               | 337.0293 | 11   |
| 337.004 | 44460.9 | O                            | 3p <sup>3</sup> S-3d<br><sup>3</sup> D°       | 336.9373 | 0    |
| 337.004 | 44460.9 | CO <sub>2</sub> <sup>+</sup> | X <sup>2</sup> Pi-A <sup>2</sup> Pi           | 337      | 800  |
| 337.004 | 44460.9 | O <sub>2</sub>               | X <sup>3</sup> Sig-g-<br>A <sup>3</sup> Sig+u | 337      | 1000 |
| 337.004 | 44460.9 | O <sub>2</sub>               | X <sup>3</sup> Sig-g-<br>B <sup>3</sup> Sig-u | 337.01   | 1000 |
| 353.505 | 11069.6 | O                            | 3s' <sup>3</sup> P-<br>3p <sup>3</sup> P°     | 353.4904 | 355  |
| 357.537 | 28744.5 | O                            | 3d <sup>2</sup> D-<br>5p <sup>2</sup> P°      | 357.4845 | 0    |
| 370.859 | 3132.8  | O                            | 3s' 5P-<br>3p'5D°                             | 370.9543 | 235  |
| 375.384 | 6103.35 | O                            | 3s <sup>3</sup> P°-<br>3p <sup>3</sup> D      | 375.4696 | 265  |
| 380.338 | 10235.7 | O                            | 3p <sup>2</sup> P°-<br>4s <sup>2</sup> P      | 380.2984 | 74   |
| 380.338 | 10235.7 | O                            | 3p <sup>2</sup> P°-<br>4s <sup>2</sup> P      | 380.3111 | 480  |
| 380.338 | 10235.7 | O                            | 3s 4P-<br>3p <sup>2</sup> D°                  | 380.3137 | 0    |
| 391.324 | 5046.02 | O <sub>2</sub>               | X <sup>3</sup> Sig-g-<br>B <sup>3</sup> Sig-u | 391.4    | 800  |
| 399.647 | 3738.35 | CO <sup>+</sup>              | X <sup>2</sup> Sig+-<br>A <sup>2</sup> Pi     | 399.73   | 900  |
| 405.771 | 4072.8  | O                            | 3s' <sup>3</sup> D-<br>4p <sup>3</sup> D      | 405.7216 | 0    |
| 405.771 | 4072.8  | O                            | 3s' <sup>3</sup> D-<br>4p <sup>3</sup> D      | 405.7281 | 1    |
| 405.771 | 4072.8  | O                            | 3s' <sup>3</sup> D-<br>4p <sup>3</sup> D      | 405.8059 | 1    |

|         |         |   |                                           |          |     |
|---------|---------|---|-------------------------------------------|----------|-----|
| 405.771 | 4072.8  | O | 3s' <sup>3</sup> D-<br>4p <sup>3</sup> D  | 405.8517 | 1   |
| 750.495 | 2040.57 | O | 3d' <sup>2</sup> G-<br>5f <sup>2</sup> G° | 750.4033 | 1   |
| 750.495 | 2040.57 | O | 3d' <sup>2</sup> G-<br>5f <sup>2</sup> G° | 750.4708 | 49  |
| 844.688 | 2593.57 | O | 3s <sup>3</sup> S°-<br>3p <sup>3</sup> P  | 844.6247 | 115 |
| 844.688 | 2593.57 | O | 3s <sup>3</sup> S°-<br>3p <sup>3</sup> P  | 844.6359 | 574 |
| 844.688 | 2593.57 | O | 3s <sup>3</sup> S°-<br>3p <sup>3</sup> P  | 844.6758 | 345 |

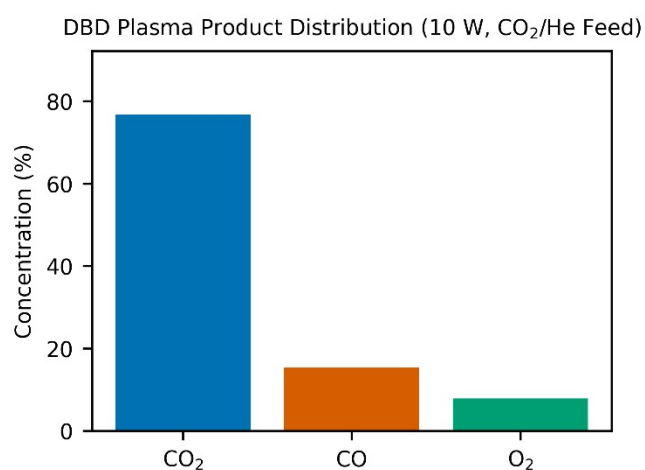

**Figure S6:** At a power of 10 W, the distribution of products from CO<sub>2</sub> NTP DBD was observed with a CO<sub>2</sub> flow rate of 30 NmL min<sup>-1</sup> and an additional He flow of 5 NmL min<sup>-1</sup>. No reactions driven by electrochemical processes were involved in this plot.

1  
2  
3  
4  
5

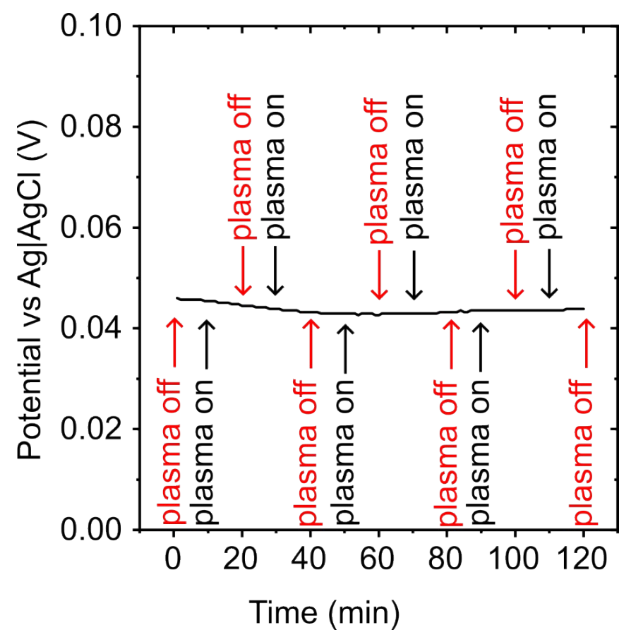

1

2 **Figure S7:** Open circuit voltage showing no effect of the plasma source on the  
3 electrochemical data.

1 **S4: An electrochemical and product comparison between the performance of**  
2 **the electrolyser cell when the plasma source is switched on and off at different**  
3 **current densities for a fixed duration**

4 Figs. S8-S12 compare the plasma-off and plasma-on voltage–current density  
5 responses of the electrolyte gap electrolyser over the current density range of 100 to  
6 225 mA cm<sup>-2</sup>. The cell voltage was consistently higher for plasma-off conditions, a  
7 theme that is evident across the various applied current experiments. For example, at  
8 100 mA cm<sup>-2</sup>, the cell voltage for the plasma-off experiment was 3.42 V. In contrast,  
9 the cell voltage during the plasma-on experiment was 2.58 V.

10 Fig. S8 shows the results of operating the electrolyte gap electrolyser at 100 mA cm<sup>-2</sup>.  
11 In the plasma-off mode, after an induction period of *ca.* 1.5 – 2 s, a relatively stable  
12 cell voltage of 3.25 V (red line trace) is achieved, which then slowly drifts over 2600 s  
13 to up to *ca.* 3.45 V. When operating in plasma-on mode, a smaller cell voltage of  
14 2.58 V is attained, which remains constant during the 1-hour experiment in Fig. S8  
15 (black line trace).

16 In addition to the differences in operating cell voltage, differences were also observed  
17 in the product distribution and FE. Plasma-off resulted in carbon monoxide, methane,  
18 and ethylene (FE 64.74 ± 2.92%, 6.64 ± 0.60%, and 4.01 ± 0.55%, respectively) as  
19 the reaction products, along with hydrogen at an FE of 22.21 ± 1.63%, which was  
20 produced as a side reaction. The activation of CO<sub>2</sub> molecules by implementing a CO<sub>2</sub>  
21 plasma source and integrating it into the electrochemical cell resulted in the generation  
22 of both gaseous and liquid products. The primary gaseous products of the CO<sub>2</sub>  
23 plasma–electrochemical experiment were CO and ethylene, with yields of 23.59 ±  
24 1.92% and 36.99 ± 1.06%, respectively. In addition, liquid products, including ethanol  
25 and acetate (C2 products), and formate (C1 product), with FE rates of 16.58 ± 1.51%,  
26 4.83 ± 1.21%, and 8.41 ± 1.37%, respectively, were also generated. Furthermore,  
27 methane gas production disappeared, and the FE for H<sub>2</sub> decreased to 6.14%.

28

29

30

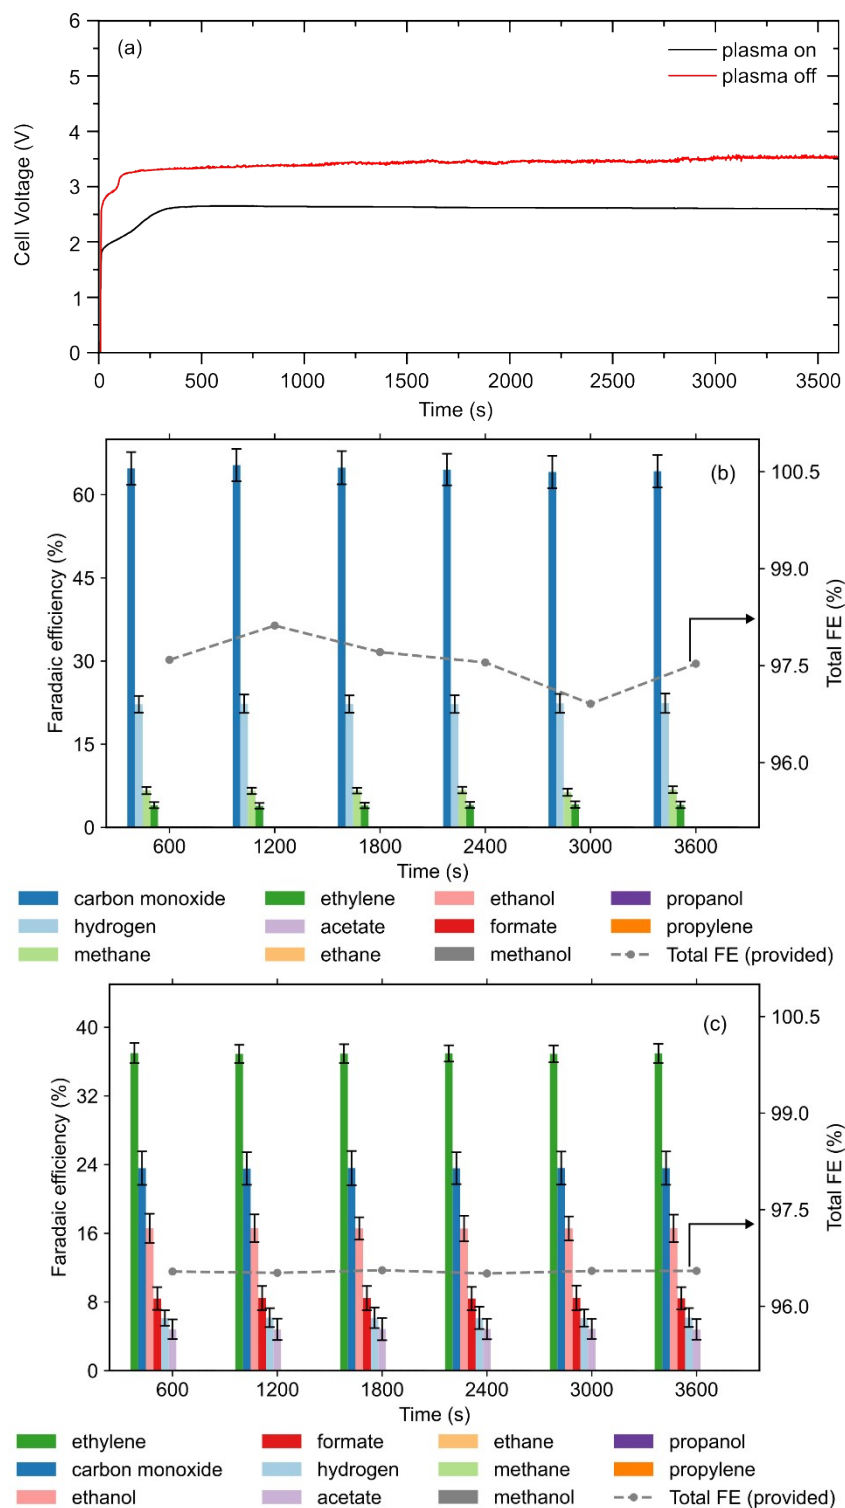

**Figure S8:** Galvanostatic experiments at  $100 \text{ mA cm}^{-2}$  using an electrolyte-gap electrolyser and  $0.5 \text{ M CsHCO}_3 + 0.25 \text{ M Cs}(\text{SO}_3\text{CH}_3) + 0.25 \text{ M Cs}_2\text{SO}_4$  aqueous electrolyte. Cell voltage **(a)** during the plasma-off (red) and  $\text{CO}_2$  plasma-on (black) electrolysis of  $\text{CO}_2$  and FE for gas and liquid products in plasma-off **(b)** and  $\text{CO}_2$  plasma-on **(c)** modes.

1 Fig. S9 (a) compares the cell voltage profiles for CO<sub>2</sub> electroreduction under plasma-  
2 on and plasma-off conditions at a current density of 125 mA cm<sup>-2</sup>. The cell voltage  
3 profile over time reveals a distinct difference between the two conditions. With plasma  
4 off (red line), the voltage remained relatively stable at approximately 3.86 V throughout  
5 the 3600 s. In contrast, the plasma-on condition (black line) shows a consistently lower  
6 voltage, which stabilises at approximately 2.86 V.

7 Fig. S9 (b) and (c) present the FEs of various CO<sub>2</sub> reduction products over time for  
8 plasma-off and plasma-on conditions, respectively. In the absence of plasma (Fig. S9  
9 b), CO dominates the product distribution with FEs ranging from 60% to 65%, followed  
10 by H<sub>2</sub> (~20%–25%). Minor products such as methane, and ethylene appear in trace  
11 amounts, consistent with the competitive nature of the HER in conventional  
12 electrolysis

13 Under the plasma on (Fig. S9 (c)), a notable shift in product selectivity is observed,  
14 with the disappearance of methane. The FE of CO decreases significantly (~20–25%),  
15 while multi-carbon (C<sub>2</sub>+) products, such as ethylene, ethanol, and propanol, show  
16 marked increases, reaching FEs of ~40% for ethylene, for example.

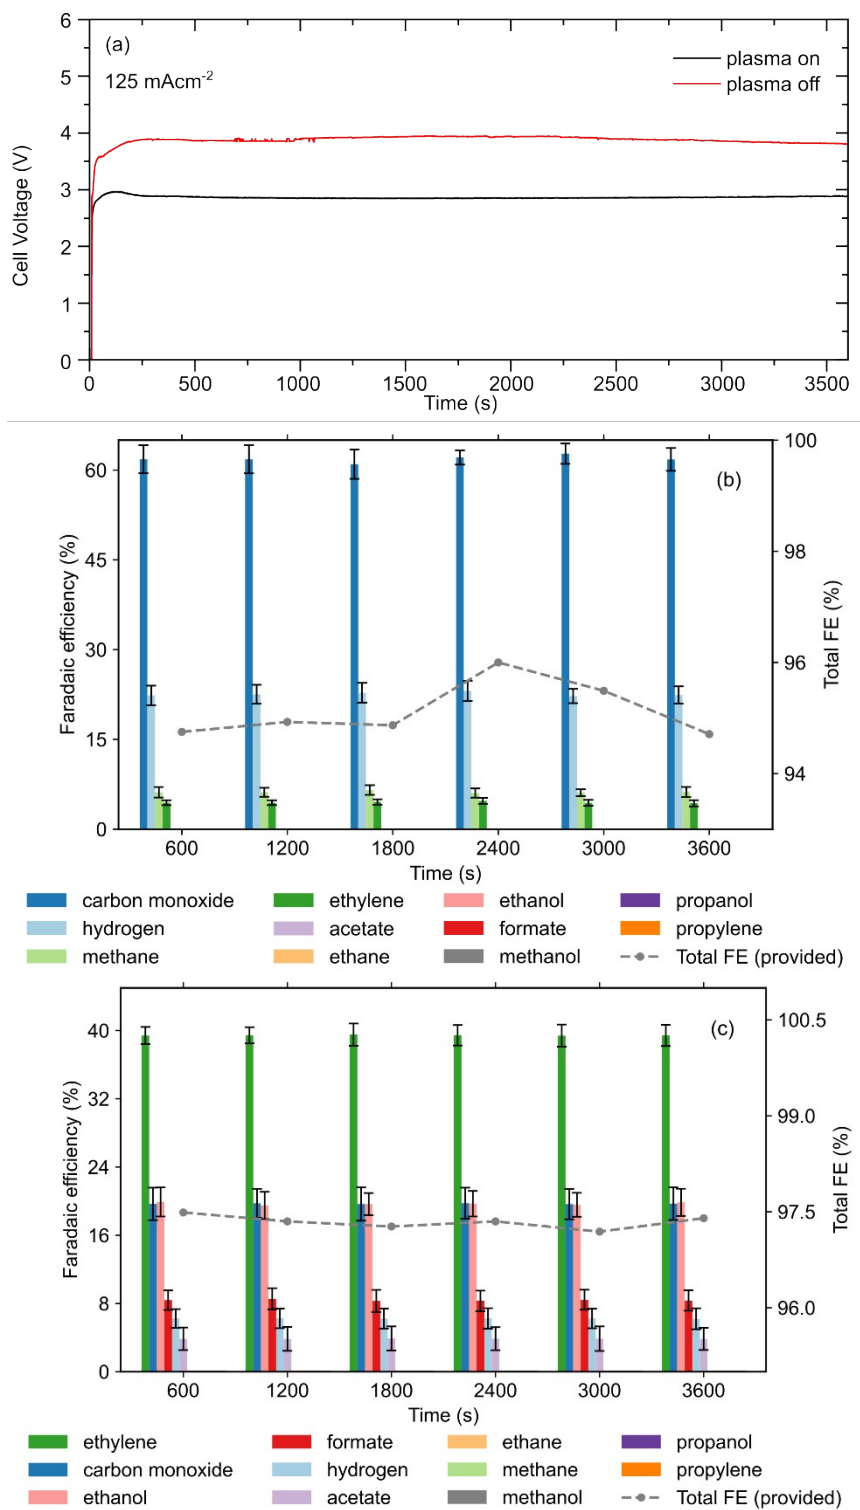

**Figure S9:** Galvanostatic experiments at 125 mA cm<sup>-2</sup> using the electrolyte-gap electrolyser and 0.5 M CsHCO<sub>3</sub> + 0.25 M Cs(SO<sub>3</sub>CH<sub>3</sub>) + 0.25 M Cs<sub>2</sub>SO<sub>4</sub> aqueous electrolyte. Cell voltage (a) the plasma-off (red) and the CO<sub>2</sub> plasma-on (black) electrolysis of CO<sub>2</sub> and FE for gas and liquid products in plasma-off (b) and CO<sub>2</sub> plasma-on (c) modes.

1

2 Fig. S10 plots (a) illustrate the cell voltage profiles over time for the plasma-on and  
3 plasma-off conditions at a current density of  $150 \text{ mA cm}^{-2}$ . The plasma-on condition  
4 (black line) consistently exhibited a lower cell voltage. With plasma off (red line), the  
5 voltage value was approximately 4.12 V throughout the 3600 s duration. In contrast,  
6 the plasma-on condition (black line) showed a consistently lower voltage, which  
7 stabilised at approximately 2.97 V.

8 Fig. S10 (b) and (c) present the FEs of various  $\text{CO}_2$  reduction products over time for  
9 the plasma-off and plasma-on conditions, respectively. In the plasma-off condition  
10 (Fig. S10 b), the dominant product is CO, with an FE ranging from ~50% to 60%,  
11 followed by  $\text{H}_2$  (~20%–30%). Minor products, such as methane, ethylene, ethanol, and  
12 formate, are present in low quantities. This distribution reflects the typical challenge in  
13  $\text{CO}_2$  electroreduction, wherein the HER competes strongly with  $\text{CO}_2$  reduction,  
14 especially at higher current densities. However, we notice the commencement of the  
15 production of liquid products, where ethanol is the main product with FE ~8%

16 In the plasma-on condition (Fig. S10 c), a significant shift in the product distribution  
17 was observed. The FE of  $\text{H}_2$  decreased substantially, and methane was not produced,  
18 whereas the formation of multi-carbon products, such as ethylene, ethanol, and  
19 propanol, increased. Ethylene reached an FE of ~40–45%, indicating enhanced C–C  
20 coupling pathways. The total FE also appeared more stable and higher under plasma  
21 conditions, suggesting improved selectivity and utilisation of electrons toward C2 and  
22 C3 products.

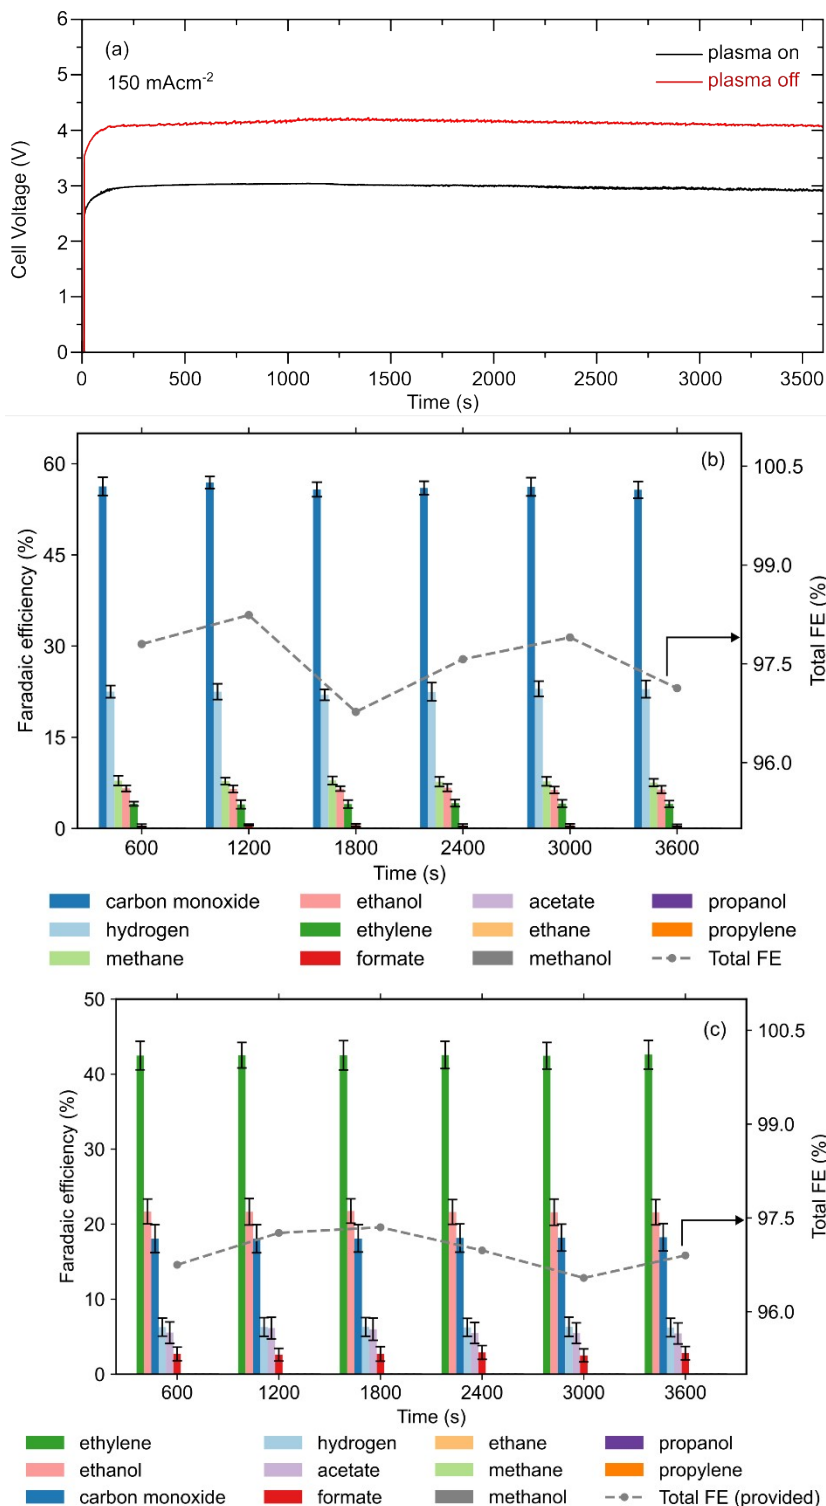

**Figure S10:** Galvanostatic experiments at 150 mA cm<sup>-2</sup> using the electrolyte-gap electrolyser and 0.5 M CsHCO<sub>3</sub> + 0.25 M Cs(SO<sub>3</sub>CH<sub>3</sub>) + 0.25 M Cs<sub>2</sub>SO<sub>4</sub> aqueous electrolyte. Cell voltage (a) the plasma-off (red) and the CO<sub>2</sub> plasma-on (black) electrolysis of CO<sub>2</sub> and FE for gas and liquid products in plasma-off (b) and CO<sub>2</sub> plasma-on (c) modes.

1 Fig. S11 plot (a) shows the cell voltage profiles over time for the plasma-on and  
2 plasma-off conditions at a current density of  $200 \text{ mA cm}^{-2}$ . The plasma-on condition  
3 (black line) exhibited a lower cell potential. With plasma off (red line), the voltage  
4 registered was approximately 4.58 V throughout the 3600 s duration. In contrast, the  
5 plasma-on condition (black line) shows a consistently lower voltage of approximately  
6 3.41 V.

7 Fig. S11 (b) and (c) present the FEs of various  $\text{CO}_2$  conversion products over time for  
8 the plasma-off and plasma-on conditions, respectively. Under the plasma-off condition  
9 (b), the dominant product is CO, with an FE ranging from ~40% to 45%, followed by  
10  $\text{H}_2$  (~20%–30%). The drop in the FE of CO is accompanied by the formation of  
11 products such as methane, ethylene, ethanol, and formate. This distribution reflects  
12 the typical challenge in  $\text{CO}_2$  electroreduction, wherein the HER competes strongly with  
13  $\text{CO}_2$  reduction, especially at higher current densities. Under the plasma-on condition  
14 (c), a significant shift in the product distribution is observed. The FE of  $\text{H}_2$  decreases  
15 substantially, whereas the formation of multi-carbon products, such as ethylene,  
16 ethanol, formate, ethane, acetate, and propanol, increases. Ethylene has an FE of ~  
17 40 %–45% under these conditions.

18

19

20

21

22

23

24

25

26

27

28

29



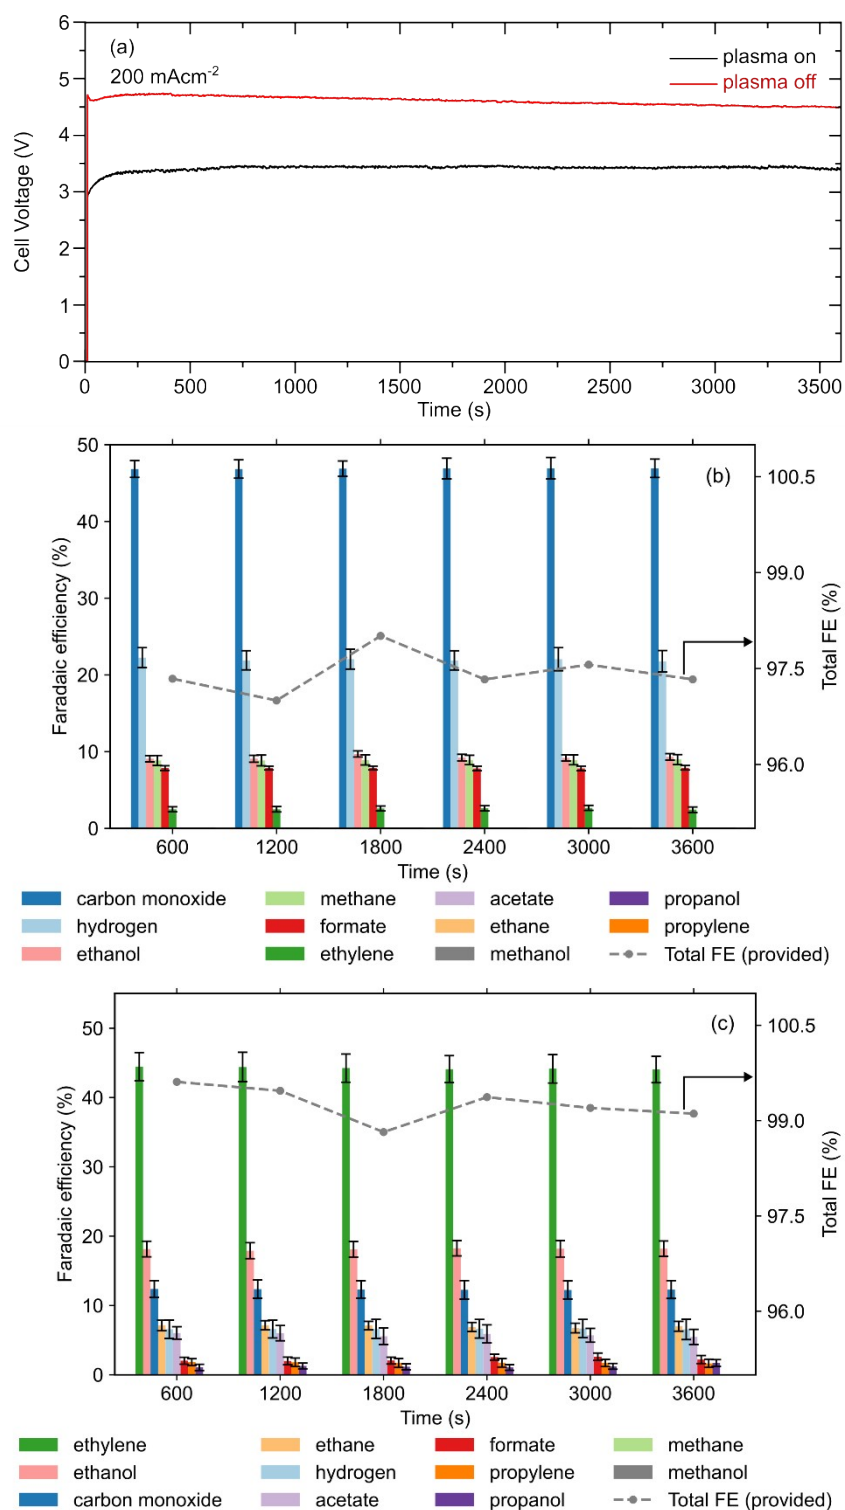

**Figure S11:** Galvanostatic experiments at 200 mA cm<sup>-2</sup> using the electrolyte-gap electrolyser and 0.5 M CsHCO<sub>3</sub> + 0.25 M Cs(SO<sub>3</sub>CH<sub>3</sub>) + 0.25 M Cs<sub>2</sub>SO<sub>4</sub> aqueous electrolyte. Cell voltage (a) the plasma-off (red) and the CO<sub>2</sub> plasma-on (black) electrolysis of CO<sub>2</sub> and FE for gas and liquid products in plasma-off (b) and CO<sub>2</sub> plasma-on (c) modes.

1 Fig. S12 plot (a) shows the cell voltage profiles over time for the plasma-on and  
2 plasma-off conditions at a current density of  $225 \text{ mA cm}^{-2}$ . The plasma-on condition  
3 (black line) continues to exhibit a lower cell voltage. With plasma off (red line), the  
4 voltage registered is approximately 5.53 V throughout the 3600 s duration. In contrast,  
5 the plasma-on condition (black line) shows a consistently lower voltage of  
6 approximately 3.50 V.

7 Fig. S12 (b) and (c) present the FEs of various  $\text{CO}_2$  conversion products over time  
8 under plasma-off and plasma-on conditions, respectively. Under the plasma-off  
9 condition (b), the dominant carbon product is CO, with an FE ranging from ~20% to  
10 35%.  $\text{H}_2$  reached (~30%–48%). The drop in the FE of CO is accompanied by the  
11 formation of products such as methane, ethylene, ethanol, and formate. Ethanol was  
12 the main liquid product during the plasma-off experiment, with an FE ranging between  
13 15% and 30%. Under the plasma-on condition (c), a significant shift in the product  
14 distribution was observed. The FE of  $\text{H}_2$  decreased substantially, whereas the  
15 formation of multi-carbon products, such as ethylene, ethanol, formate, ethane,  
16 acetate, and propanol, increased. Similar to the previous experiments, ethylene was  
17 the dominant product and reached an FE of ~42%–50%.

18

19

20

21

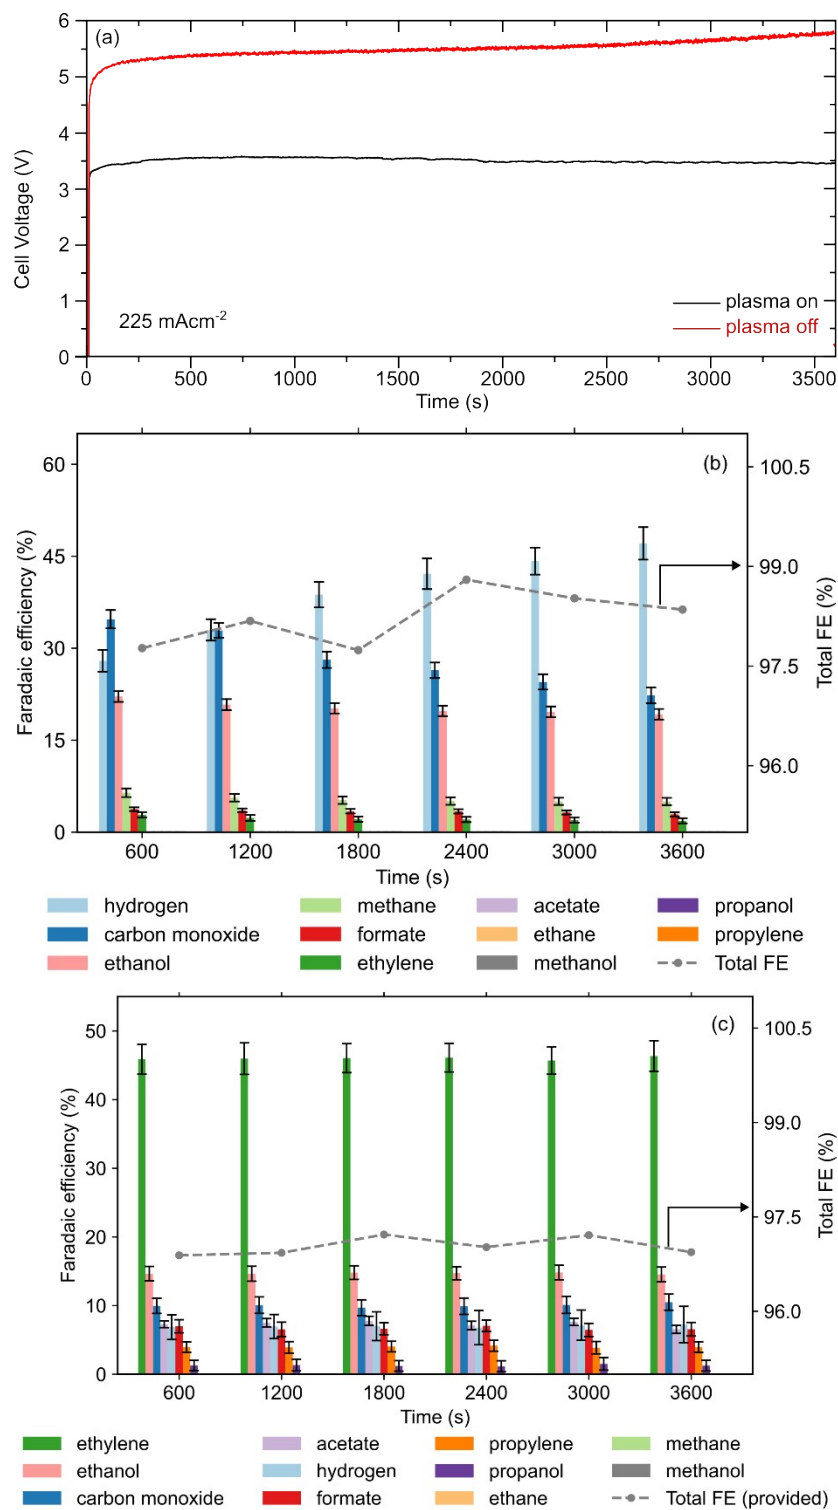

**Figure S12:** Galvanostatic experiments at  $225 \text{ mA cm}^{-2}$  using the electrolyte-gap electrolyser and  $0.5 \text{ M CsHCO}_3 + 0.25 \text{ M Cs(SO}_3\text{CH}_3) + 0.25 \text{ M Cs}_2\text{SO}_4$  aqueous electrolyte. Cell voltage (a) the plasma-off (red) and the  $\text{CO}_2$  plasma-on (black) electrolysis of  $\text{CO}_2$  and FE for gas and liquid products in plasma-off (b) and  $\text{CO}_2$  plasma-on (c) modes.

1 Table S2 presents a comparison of the average cell voltage throughout the  
 2 experiments, which were conducted for 1 h of electrolysis at each current density  
 3 between 100 and 225 mA cm<sup>-2</sup>. The trend exhibits a continued increase with  
 4 increasing applied current density, resulting in a voltage difference that reaches  $|\Delta E|$   
 5 =  $E_{\text{plasma-off}} - E_{\text{plasma-on}} = 2.03$  V at an applied current density of 225 mA cm<sup>-2</sup>.

6 **Table S2:** the average of the cell voltage over 1 hour of electrolysis

|                                        | Plasma-off       | Plasma-on | Voltage difference (V) |
|----------------------------------------|------------------|-----------|------------------------|
| Current density (mA cm <sup>-2</sup> ) | Cell Voltage (V) |           |                        |
| 100                                    | 3.42             | 2.58      | 0.84                   |
| 125                                    | 3.86             | 2.86      | 1                      |
| 150                                    | 4.12             | 2.97      | 1.15                   |
| 175                                    | 4.31             | 3.19      | 1.12                   |
| 200                                    | 4.58             | 3.41      | 1.17                   |
| 225                                    | 5.53             | 3.50      | 2.03                   |

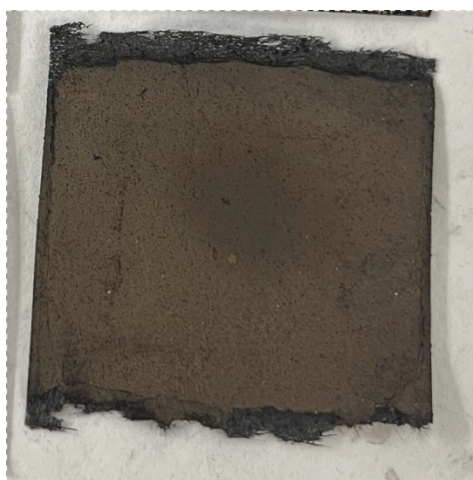

7 **Figure S13:** Image of the electrode after one hour of exposure to CO<sub>2</sub> NTP DBD  
 8 experiments integrated with electrochemical reduction at 175 mA cm<sup>-2</sup>.

9

1 **S5: Faradaic and energy efficiency for gas and liquid products from CO<sub>2</sub>**  
2 **electrochemical conversion**

3 Although faradaic efficiency (FE) serves as a direct measure of electron selectivity  
4 relative to total charge transfer, fluctuations in the rate of CO<sub>2</sub> conversion by plasma  
5 can introduce secondary effects on local reactant availability and gas-phase residence  
6 times. Specifically, these variations influence the lifetime and transport kinetics of  
7 transient, plasma-activated species as they migrate from the discharge zone to the  
8 GDE interface.

9 The FE of a product is calculated using the following general equation:

10

$$FE(\%) = \frac{Q_{prod}}{Q_{total}} \times 100$$

11

Eq. S1

12

13 Where  $Q_{product}$  is the charge consumed to generate a specific product, and  $Q_{total}$  is the  
14 total charge passed during the reaction

15 The FE for each sampling interval  $\Delta t$  is:

16

$$FE(\%) = \frac{n_e F N_{product}}{I \Delta t} \times 100$$

17

Eq.

18 S2

19

20 Where  $n_e$  is the number of electrons transferred per molecule of the product,  $F$  is the  
21 Faraday constant,  $N_{product}$  is the amount of product (mol) formed during the sampling  
22 interval  $\Delta t$  and  $I$  is the current.

23 For gaseous products which was collected every 600 s (10 minutes)

$$N_{product} = x \Delta t$$

24

Eq. S3

25

26 Where  $x$  is the molar flow rate mol min<sup>-1</sup> measured for each product, and

$$x = \frac{v}{V_m}$$

Eq. S4

2

3  $v$  is the normal flow rate (NL min<sup>-1</sup>) at 25 °C and  $V_m$  is the molar volume ( $V_m = 24.46$  L  
4 mol<sup>-1</sup>)

5 We employed an internal standard gas to measure gas products during CO<sub>2</sub> reduction.  
6 During CO<sub>2</sub> electrolysis, reactions consume carbon dioxide and produce various  
7 products at distinct stoichiometric ratios. For instance, the synthesis of one molecule  
8 of ethylene necessitates the consumption of two molecules of CO<sub>2</sub>. Additionally,  
9 certain products, such as water, may condense and separate from the gas stream.  
10 Consequently, the total outlet flow rate is seldom identical to the total inlet flow rate.  
11 We introduced a known flow rate (5 NL/min) of an inert gas, nitrogen (N<sub>2</sub>), into the  
12 collected gas stream. It is important to note that the N<sub>2</sub> line bypasses the  
13 electrochemical cell. As the internal standard gas does not undergo reactions at the  
14 electrodes and does not condense, its flow rate remains constant from the inlet to the  
15 outlet. We then find the exact volumetric flow rate of a product by multiplying the mole  
16 fraction of gas product measured by GC by the volumetric flow rate of the internal  
17 standard then by dividing by the mole fraction of the internal standard measured by the  
18 GC *i.e.*

$$v = \frac{\text{mole fraction of gas product} \times \text{volumetric flow rate of the internal standard}}{\text{mole fraction of the internal standard}}$$

19

20 . we then use  $v$  in eq. S4.

21 The liquid was collected in 600 s fractions. For liquid products quantified by UHPLC,  
22  $N_{\text{product}} = C_{\text{product}} \times V_{\text{liquid}}$ , where  $N_{\text{product}}$  is the moles of product formed during the  
23 sampling interval  $\Delta t = 600$  s,  $C_{\text{product}}$  is the measured liquid concentration and  $V_{\text{liquid}}$  is  
24 the collected liquid volume for that 600 s fraction (catholyte outlet fraction + water trap  
25 fraction collected over the same interval).

26

$$FE_{\text{liquid}} = \frac{n_e F C_{\text{product}} V_{\text{liquid}}}{I \Delta t}$$

27

Eq.

28 S5

29

1 Liquid-phase products were sampled at discrete 600 s intervals ( $\Delta t$ ) by pooling  
2 effluents from both the catholyte outlet and the water trap. These quantities were  
3 quantified using ultra-high-performance liquid chromatography (UHPLC) with external  
4 calibration standards.

5 The total molar yield for each interval was calculated as the sum of the contributions  
6 from the catholyte and the trap. Faradaic efficiencies were subsequently determined  
7 based on the stoichiometric electron requirements for each specific  $\text{CO}_2$  reduction  
8 pathway.

9 The full cell energy efficiency (EE) for plasma-off conditions is:<sup>4</sup>

$$10 \quad EE_{product, plasma-off}(\%) = \frac{\Delta V_{thermo, product}}{\Delta V_{cell}} \times FE_{product} \times 100 \quad \text{Eq. S6}$$

$$11 \quad \Delta V_{thermo, product} = \frac{\Delta G_{product}}{-nF} \quad \text{Eq. S7}$$

12 Where  $\Delta V_{thermo, product}$  is the thermodynamic cell voltage for the overall cell reaction of  
13  $\text{CO}_2$  with  $\text{H}_2\text{O}$  to give the product (CO, ethylene, ethane, ethanol, etc) and oxygen,  
14  $\Delta G_{product}$  is the change in Gibbs free energy for that reaction,  $\Delta V_{cell}$  is the potential  
15 applied across the reactor,  $F$  is the Faraday constant,  $FE_{product}$  is the Faradaic  
16 efficiency for each product, and  $n$  is the number of electrons consumed to produce a  
17 specific product.

18 During the electrochemical conversion with plasma-on, the previously mentioned  
19 equation needs to be adjusted to account for the energy employed to create the  
20 plasma ( $E_{plasma} = P_{plasma}t$ ). Consequently, the plasma-on energy efficiency is:

$$21 \quad EE_{product, plasma-on}(\%) = \frac{\Delta V_{thermo, product} I_{product}}{(\Delta V_{cell} I) + P_{plasma}} \times 100 \quad \text{Eq. S8}$$

22 In Fig. S14, plasma-off experiments are dominated by CO and methane, with limited  
23 formation of complex products. In contrast, plasma-on experiments led to a significant  
24 increase in ethylene, ethanol, and acetate, indicating enhanced C–C coupling and  
25 oxygenate formation.

1 The overall reaction combines the CO<sub>2</sub>RR at the CuO cathode with the oxygen  
 2 evolution reaction (OER) at the IrO<sub>2</sub> anode. The anodic half-reaction of IrO<sub>2</sub> in an  
 3 aqueous solution is generally the OER:

4 Anode (Oxidation):  $2\text{H}_2\text{O} \rightarrow \text{O}_2 + 4\text{H}^+ + 4\text{e}^-$

5 The cathodic half-reactions for the reduction of CO<sub>2</sub> to various products on CuO  
 6 catalysts are as follows:

| Target Product                                                       | Overall Balanced Cell Reaction                                                                               |
|----------------------------------------------------------------------|--------------------------------------------------------------------------------------------------------------|
| Carbon Monoxide (CO)                                                 | $2\text{CO}_2 \rightarrow 2\text{CO} + \text{O}_2$                                                           |
| Formate (HCOOH)                                                      | $2\text{CO}_2 + 2\text{H}_2\text{O} \rightarrow 2\text{HCOOH} + \text{O}_2$                                  |
| Methane (CH <sub>4</sub> )                                           | $\text{CO}_2 + 2\text{H}_2\text{O} \rightarrow \text{CH}_4 + 2\text{O}_2$                                    |
| Ethylene (C <sub>2</sub> H <sub>4</sub> )                            | $2\text{CO}_2 + 2\text{H}_2\text{O} \rightarrow \text{C}_2\text{H}_4 + 3\text{O}_2$                          |
| Ethanol (C <sub>2</sub> H <sub>5</sub> OH)                           | $2\text{CO}_2 + 3\text{H}_2\text{O} \rightarrow \text{C}_2\text{H}_5\text{OH} + 3\text{O}_2$                 |
| Acetate (C <sub>2</sub> H <sub>3</sub> O <sub>2</sub> <sup>-</sup> ) | $2\text{CO}_2 + 2\text{H}_2\text{O} \rightarrow \text{C}_2\text{H}_3\text{O}_2^- + \text{H}^+ + 3\text{O}_2$ |

7

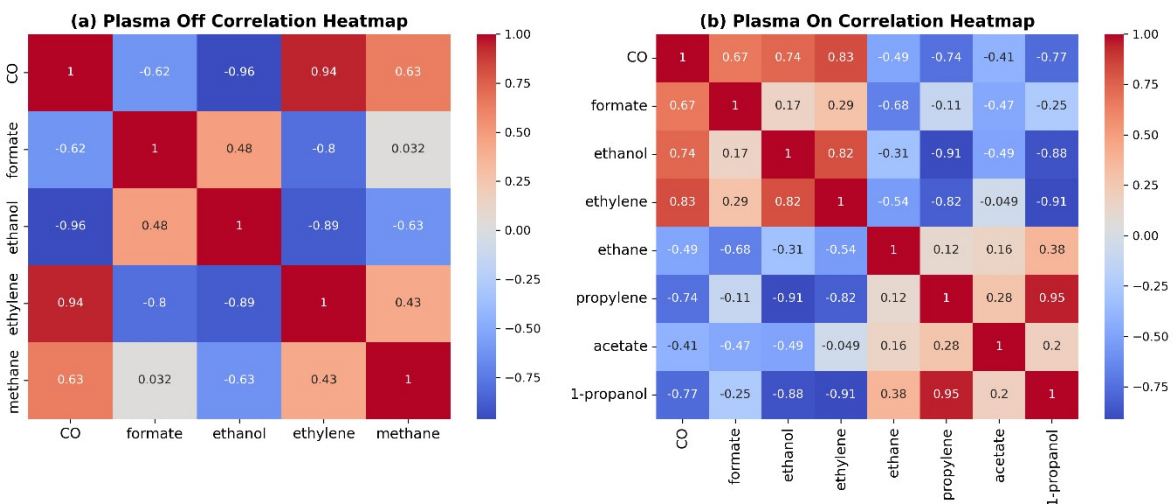

8 **Figure S14:** Correlation heatmap of gas and liquid products during (a) plasma-off and  
 9 (b) plasma-on experiments at 175 mA cm<sup>-2</sup>.

1 The correlation heatmap under plasma-off conditions shows a pronounced negative  
2 correlation between CO and ethanol, indicating that a decrease in CO is associated  
3 with an increase in ethanol. It also exhibits a positive correlation between methane  
4 and ethylene, suggesting analogous formation pathways. Under plasma-on  
5 conditions, the correlation heatmap reveals a strong positive correlation among  
6 ethylene, ethanol, and acetate, suggesting a shared or synergistic formation  
7 mechanism. Additionally, there is a negative correlation between CO and most C3  
8 products, supporting the assertion that plasma alters the reaction pathway away from  
9 simple products.

10

## 1 **S6: Carbon efficiency for gas products from CO<sub>2</sub> electrochemical conversion**

2 Herein, we discuss the yield or carbon efficiency, *that is*, the ratio of CO<sub>2</sub> used in  
3 product formation to the number of moles of CO<sub>2</sub> that entered the cell. Equation 9  
4 below is the general gas-phase formula for carbon efficiency.<sup>4, 5</sup>

5 It is defined as:

$$6 \quad \text{carbon efficiency gas (\%)} = \left( \frac{\sum(n_x \times C_x)}{(n_{CO_2, in})} \right) \times 100$$

Eq. S9

7 **Where:**

8  $n_x$  is the number of moles of product  $x$  created

9  $C_x$  is the number of carbons in products  $x$

10  $n_{CO_2, in}$  is the number of moles of CO<sub>2</sub> that entered the cell

11 In the context of this study, carbon efficiency (%) refers to the carbon yield of the  
12 identified CO<sub>2</sub> reduction products relative to the total amount of CO<sub>2</sub> fed into the  
13 system. The CO<sub>2</sub> inlet flow was 30 NmL min<sup>-1</sup>. Subsequently, we measured the outlet  
14 flow rate and product concentration using GC and HPLC, in conjunction with a flow  
15 meter at the outlet. We quantified the concentrations of gaseous and liquid products  
16 in terms of molar flow rates. All gas flow data were converted to molar flows using the  
17 ideal gas law, under the assumption of normal conditions (*i.e.*, 25 °C; some may refer  
18 to this condition as standard conditions more specifically in industry). Finally, we  
19 employed the aforementioned equation to calculate the carbon efficiency.

20 **Example 1:**

21 For plasma off condition and at 100 mA cm<sup>-2</sup>, the applied current density for  
22 electrolysis,

23 The Molar flow of inlet CO<sub>2</sub> was calculated at normal (standard) conditions; hence, the  
24 temperature was 298.15 K (25 °C)

$$25 \quad n_{CO_2, in} = \frac{30}{24.46 \times 1000} = 0.03 \text{ NL min}^{-1} \div 24.46 \text{ L mol}^{-1} = 1.23 \times 10^{-3} \text{ mol min}^{-1}$$

1 Since samples were collected every 10 minutes, then  $n_{CO_2, in} = 0.0123 \text{ mol}$

|  |                          |                          |   |                          |
|--|--------------------------|--------------------------|---|--------------------------|
|  |                          |                          |   |                          |
|  | $2.01296 \times 10^{-5}$ | $2.01296 \times 10^{-4}$ | 1 | $2.01296 \times 10^{-4}$ |
|  | $5.16142 \times 10^{-7}$ | $5.16142 \times 10^{-6}$ | 1 | $5.16142 \times 10^{-6}$ |
|  | $2.07286 \times 10^{-7}$ | $2.07286 \times 10^{-6}$ | 2 | $4.15 \times 10^{-6}$    |

2

3 Total carbon gas product flow =  $2.10 \times 10^{-4} \text{ mol}$ .

4 *carbon efficiency gas (%)* =  $(2.10 \times 10^{-4} \text{ mol} \div 0.0123 \text{ mol}) \times 100 = 1.71\%$ .

5 **Example 2:**

6 For the plasma-on condition and at  $100 \text{ mA cm}^{-2}$ , the applied current density for  
7 electrolysis.

8

|  |                       |                       |   |                       |
|--|-----------------------|-----------------------|---|-----------------------|
|  |                       |                       |   |                       |
|  | $7.33 \times 10^{-6}$ | $7.33 \times 10^{-5}$ | 1 | $7.33 \times 10^{-5}$ |
|  | 0                     |                       | 1 | 0                     |
|  | $1.92 \times 10^{-6}$ | $1.92 \times 10^{-5}$ | 2 | $3.84 \times 10^{-5}$ |

9

10 Total carbon gas product flow =  $1.12 \times 10^{-4} \text{ mol}$ .

11 *carbon efficiency gas (%)* =  $(1.12 \times 10^{-4} \text{ mol} \div 0.0123 \text{ mol}) \times 100 = 0.91\%$ .

12

13

14

15

1

2 **Table S3:** Gas phase carbon efficiency for plasma off and plasma on conditions

| Current density (mA/cm <sup>2</sup> ) | <b>(Gas Phase) Carbon efficiency %</b> |           |
|---------------------------------------|----------------------------------------|-----------|
|                                       | Plasma Off                             | Plasma On |
| 100                                   | 1.71                                   | 0.91      |
| 125                                   | 2.05                                   | 1.04      |
| 150                                   | 2.26                                   | 1.23      |
| 175                                   | 2.55                                   | 1.34      |
| 200                                   | 2.53                                   | 1.51      |
| 225                                   | 2.12                                   | 1.52      |

3

4

1 **S7: Carbon efficiency for liquid products from CO<sub>2</sub> electrochemical conversion**

2 Equation 10 is the liquid-phase formula for carbon efficiency, which is implemented;  
3 hence, we can complement the gas-phase carbon efficiency and close the system's  
4 carbon inventory.

$$5 \quad \text{carbon efficiency liquid (\%)} = \left( \frac{\sum(n_c \times n_{product})}{n_{CO_2, in}} \right) \times 100 \quad \text{Eq. S10}$$

6 **Where:**

- 7 •  $n_c$  is number of carbon atoms in the liquid product (e.g., formate = 1, acetate =  
8 2)
- 9 •  $n_{product}$  is moles of each liquid product formed (mol)

10 The liquid product was tested by sampling and analysing the electrolyte (measured in  
11 catholyte + water trap) using HPLC. We used samples with known quantities of liquid  
12 products to generate calibration curves, which were then used to determine the  
13 concentration and total moles of each liquid product.

14 **Table S4:** Liquid carbon efficiency for plasma off and plasma on conditions

| Current density (mA cm <sup>-2</sup> ) | (Liquid Phase) Carbon efficiency % |           |
|----------------------------------------|------------------------------------|-----------|
|                                        | Plasma Off                         | Plasma On |
| 100                                    | 0                                  | 0.41      |
| 125                                    | 0                                  | 0.53      |
| 150                                    | 0.11                               | 0.48      |
| 175                                    | 0.14                               | 0.53      |
| 200                                    | 0.55                               | 0.58      |
| 225                                    | 0.63                               | 0.91      |

15

16

17

1 **S8: Carbon efficiency for carbonate and bicarbonate products from CO<sub>2</sub>**  
 2 **electrochemical conversion**

3 We used a titration method to directly measure carbonate and bicarbonate. We  
 4 performed a two-step acid titration using 0.1 M HCl to differentiate carbonate (CO<sub>3</sub><sup>2-</sup>)  
 5 and bicarbonate (HCO<sub>3</sub><sup>-</sup>). The first endpoint at pH ~8.3 is the neutralisation of CO<sub>3</sub><sup>2-</sup>  
 6 to HCO<sub>3</sub><sup>-</sup>, and the second endpoint at pH ~4.5 is the neutralisation of HCO<sub>3</sub><sup>-</sup> to CO<sub>2</sub>;  
 7 we then calculated the concentrations using stoichiometry and titrant volume. These  
 8 results were further confirmed by ion chromatography analysis. Samples were filtered  
 9 through 0.45 µm membranes to remove particulates and avoid CO<sub>2</sub> uptake or loss  
 10 and, if necessary, diluted in the eluent to minimise baseline artefacts. Separation was  
 11 achieved on a Dionex IonPac AS4A-SC (or AS14) column using a dilute  
 12 carbonate/bicarbonate eluent (~1.7–1.8 mM NaHCO<sub>3</sub>/Na<sub>2</sub>CO<sub>3</sub>), with chemical  
 13 suppression for conductivity detection and quantification employing multi-point  
 14 calibration. Tables S5–S7, the pH values reported in Tables S6–S7 correspond to the  
 15 outlet pH measured at the cell exit.

16 **Table S5:** Carbon efficiency for the conversion of CO<sub>2</sub> to carbonate and bicarbonate

| Current density (mA/cm <sup>2</sup> ) | <i>(carbonate and bicarbonate) Carbon efficiency %</i> |           |
|---------------------------------------|--------------------------------------------------------|-----------|
|                                       | Plasma Off                                             | Plasma On |
| 100                                   | 0.011                                                  | 0.01      |
| 125                                   | 0.015                                                  | 0.013     |
| 150                                   | 0.019                                                  | 0.015     |
| 175                                   | 0.022                                                  | 0.017     |
| 200                                   | 0.024                                                  | 0.02      |
| 225                                   | 0.027                                                  | 0.022     |

17

18

19

20 **Table S6:** Concentration of carbonate and bicarbonate for plasma on mode  
 21 experiments

| Current | Plasma | pH * | HCO <sub>3</sub> <sup>-</sup> | CO <sub>3</sub> <sup>2-</sup> | Total Carbonate |
|---------|--------|------|-------------------------------|-------------------------------|-----------------|
|---------|--------|------|-------------------------------|-------------------------------|-----------------|

| Density<br>(mA/cm <sup>2</sup> )                                                                     | Mode |     | (mmol) | (mmol) | (mmol) |
|------------------------------------------------------------------------------------------------------|------|-----|--------|--------|--------|
| 100                                                                                                  | On   | 7.5 | 0.11   | 0.02   | 0.13   |
| 125                                                                                                  | On   | 7.8 | 0.12   | 0.03   | 0.16   |
| 150                                                                                                  | On   | 8.1 | 0.14   | 0.04   | 0.19   |
| 175                                                                                                  | On   | 8.5 | 0.16   | 0.06   | 0.22   |
| 200                                                                                                  | On   | 8.9 | 0.17   | 0.07   | 0.25   |
| 225                                                                                                  | On   | 9.2 | 0.19   | 0.08   | 0.28   |
| *pH value at the exit of the electrolyte from the cathode compartment<br>** point of entry pH is 7.8 |      |     |        |        |        |

1

2

3 **Table S7:** Concentration of carbonate and bicarbonate for plasma off-mode  
4 experiments

| Current<br>Density<br>(mA/cm <sup>2</sup> )                                                          | Plasma<br>Mode | pH * | HCO <sub>3</sub> <sup>-</sup><br>(mmol) | CO <sub>3</sub> <sup>2-</sup><br>(mmol) | Total Carbonate<br>(mmol) |
|------------------------------------------------------------------------------------------------------|----------------|------|-----------------------------------------|-----------------------------------------|---------------------------|
| 100                                                                                                  | Off            | 8.2  | 0.09                                    | 0.04                                    | 0.14                      |
| 125                                                                                                  | Off            | 9    | 0.11                                    | 0.06                                    | 0.18                      |
| 150                                                                                                  | Off            | 9.5  | 0.13                                    | 0.09                                    | 0.23                      |
| 175                                                                                                  | Off            | 10.2 | 0.15                                    | 0.11                                    | 0.27                      |
| 200                                                                                                  | Off            | 10.8 | 0.17                                    | 0.12                                    | 0.30                      |
| 225                                                                                                  | Off            | 11.3 | 0.18                                    | 0.13                                    | 0.33                      |
| *pH value at the exit of the electrolyte from the cathode compartment<br>** point of entry pH is 7.8 |                |      |                                         |                                         |                           |

5

6

1 **S9: Carbon efficiency for all products from CO<sub>2</sub> electrochemical conversion**

2 The carbon balance is accounted for as follows. Unreacted CO<sub>2</sub>: The majority of the  
3 carbon balance is unconverted CO<sub>2</sub> that exits the reactor. This is common in flow-cell  
4 electrolysis, where high flow rates are used to maintain a stable triple-phase boundary.  
5 Carbonate and Bicarbonate Formation: A significant portion of the CO<sub>2</sub> is not  
6 electrochemically reduced but is instead chemically absorbed into the alkaline or  
7 neutral electrolyte. As indicated in the pH data/table, the total carbonate/bicarbonate  
8 concentration in the electrolyte increases during operation, reaching up to 0.33 mmol.  
9 This "parasitic" carbon capture process consumes CO<sub>2</sub> without yielding the intended  
10 fuels. *Dissolved Products: A minor fraction of gaseous products, such as CO or volatile*  
11 *liquids, may remain dissolved in the electrolyte or become trapped in the gas diffusion*  
12 *electrode (GDE) assembly, slightly reducing the recovery values.*

13

14 **Table S8:** sum of all products carbon efficiency by the sum of gas, liquid, carbonate  
15 and bicarbonate products

| Current density (mA/cm <sup>2</sup> ) | Sum of Carbon efficiency % |           |
|---------------------------------------|----------------------------|-----------|
|                                       | Plasma Off                 | Plasma On |
| 100                                   | 1.86                       | 1.33      |
| 125                                   | 2.24                       | 1.58      |
| 150                                   | 2.51                       | 1.73      |
| 175                                   | 2.84                       | 1.88      |
| 200                                   | 2.85                       | 2.11      |
| 225                                   | 2.47                       | 2.45      |

16

17

18

19

20

21

## 1 References

- 2 1. G. Leonzio, A. Hankin and N. Shah, *Chemical Engineering Research and*  
3 *Design*, 2024, **208**, 934-955.
- 4 2. J. M. Yoo, J. Ingenmey, M. Salanne and M. R. Lukatskaya, *Journal of the*  
5 *American Chemical Society*, 2024, **146**, 31768-31777.
- 6 3. S. Soldatov, G. Link, L. Silberer, C. M. Schmedt, E. Carbone, F. D'Isa, J.  
7 Jelonnek, R. Dittmeyer and A. Navarrete, *ACS Energy Letters*, 2021, **6**, 124-  
8 130.
- 9 4. D. Wakerley, S. Lamaison, J. Wicks, A. Clemens, J. Feaster, D. Corral, S. A.  
10 Jaffer, A. Sarkar, M. Fontecave, E. B. Duoss, S. Baker, E. H. Sargent, T. F.  
11 Jaramillo and C. Hahn, *Nature Energy*, 2022, **7**, 130-143.
- 12 5. S. Garg, Q. C. Xu, A. B. Moss, M. Mirolo, W. Y. Deng, I. Chorkendorff, J. Drnec  
13 and B. Seger, *Energy & Environmental Science*, 2023, **16**, 1631-1643.

14
